# Supplementary material for: “Three in one” 3D mixed skeleton design enables dendrite-free Li metal batteries
Source: Royal Society of Chemistry journal article supplement (doi:10.1039/d3qi02243a), 2023-12-20
Supplement: d3qi02243a1.pdf [file d3qi02243a1.pdf]

## Supporting Information

### **“Three in One” 3D Mixed Skeletons Design enables Dendrite-free Li Metal Batteries**

Wan-Yue Diao,<sup>a</sup> Dan Xie,<sup>\*a</sup> Ying-Yu Wang,<sup>a</sup> Fang-Yu Tao,<sup>a</sup> Chang Liu,<sup>a</sup> Xing-Long Wu,<sup>a, b</sup> Wen-Liang Li,<sup>\*a</sup> and Jing-Ping Zhang<sup>\*a</sup>

<sup>a</sup> Faculty of Chemistry Northeast Normal University Changchun, Jilin 130024, P. R. China

E-mail: xied333@nenu.edu.cn (D. Xie); liwl926@nenu.edu.cn (W.-L. Li); jpzhang@nenu.edu.cn (J.-P. Zhang).

<sup>b</sup> MOE Key Laboratory for UV Light-Emitting Materials and Technology Northeast Normal University, Changchun, Jilin 130024, P. R. China

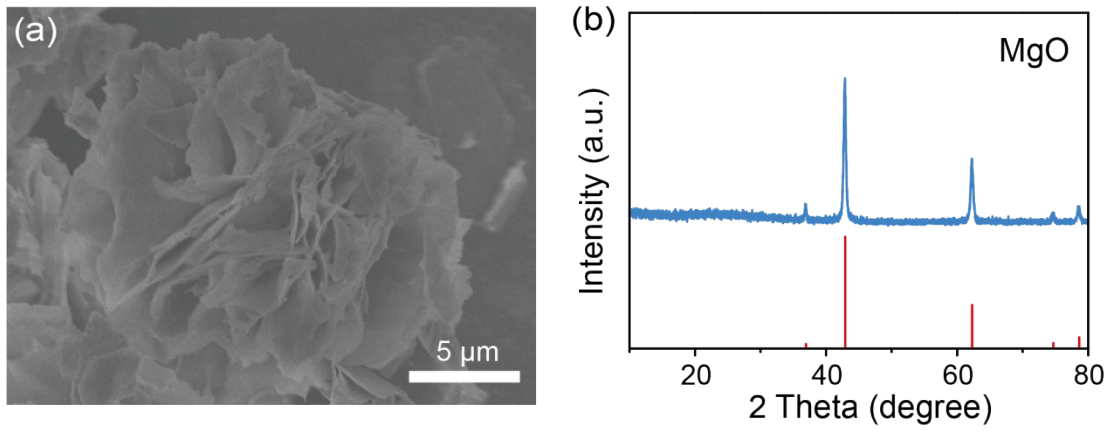

**Figure S1.** a) SEM image of MgO. b) XRD pattern of MgO.

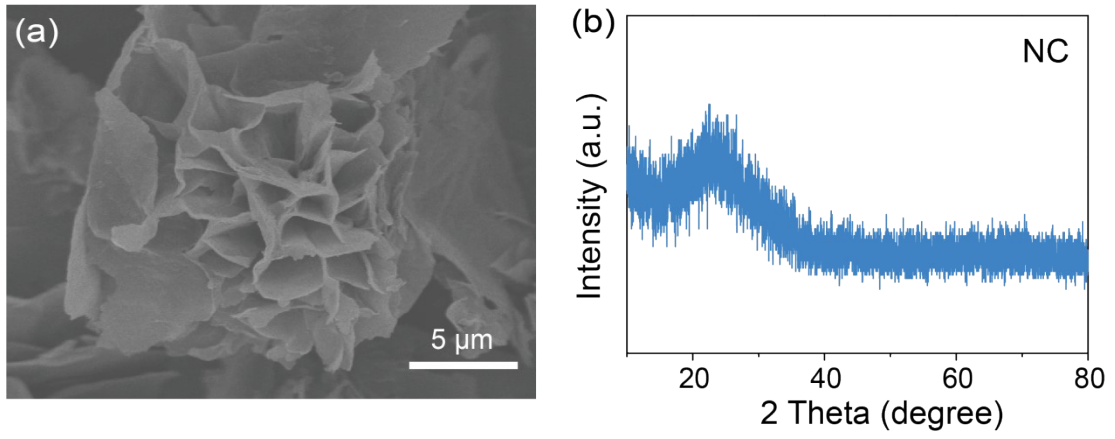

**Figure S2.** a) SEM image of N-doped carbon. b) XRD pattern of N-doped carbon.

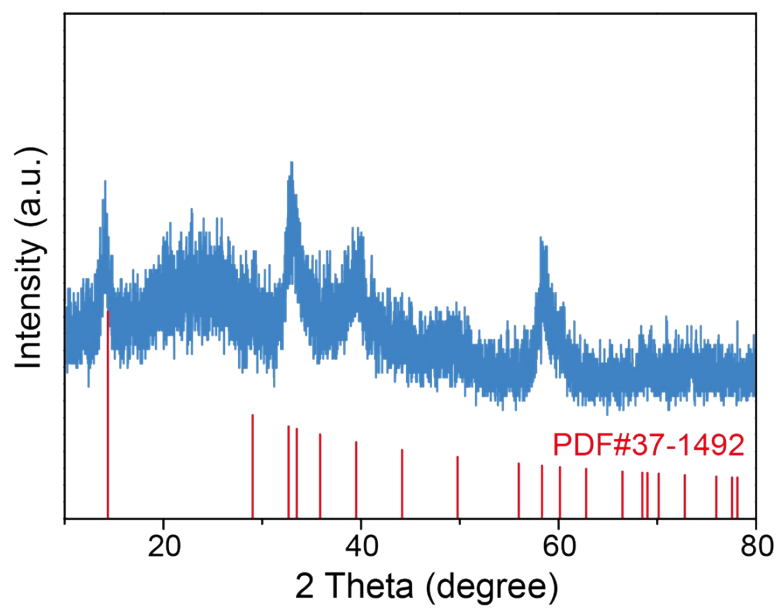

**Figure S3.** XRD pattern of h-MoS<sub>2</sub>-NC.

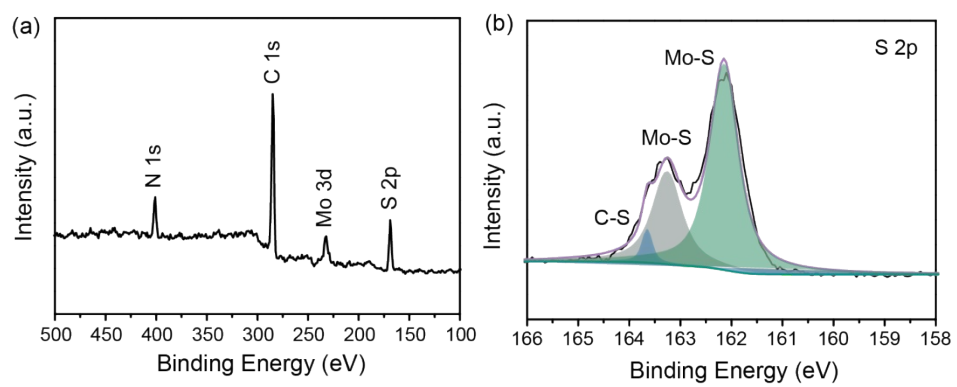

**Figure S4.** XPS spectra of the h-MoS<sub>2</sub>-NC: a) survey spectrum, b) S 2p spectrum.

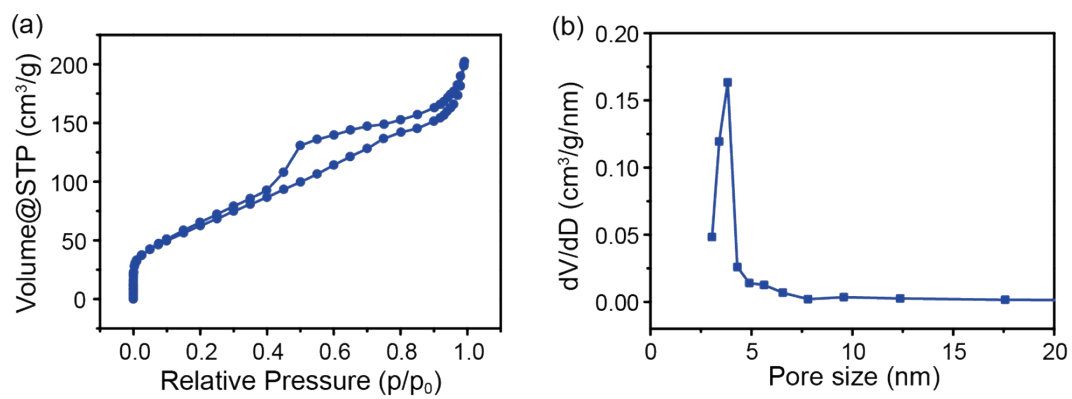

**Figure S5.** a) N<sub>2</sub> adsorption-desorption isothermal curve of the h-MoS<sub>2</sub>-NC, b) Pore size distribution of h-MoS<sub>2</sub>-NC.

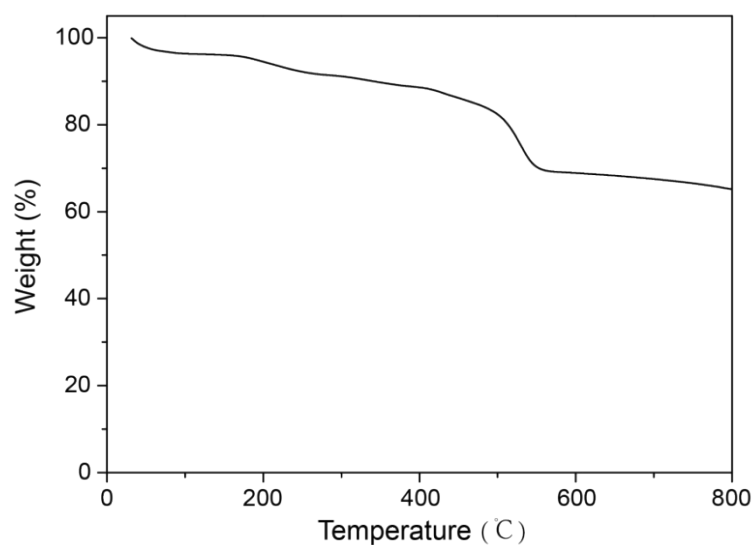

**Figure S6.** TGA curve of the h-MoS<sub>2</sub>-NC.

TGA of h-MoS<sub>2</sub>-NC was tested in air from room temperature to 800°C. The N-doped carbon framework was decomposed and MoS<sub>2</sub> was oxidized to MoO<sub>3</sub> till the temperature rise to 600°C. Thus the remaining mass (68.3%) is attributed to MoO<sub>3</sub>. The content of MoS<sub>2</sub> in h-MoS<sub>2</sub>-NC is calculated based on the following conversion:

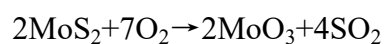

$$\frac{\omega_{\text{MoS}_2}}{M_{\text{MoS}_2}} = \frac{\omega_{\text{MoO}_3}}{M_{\text{MoO}_3}}$$

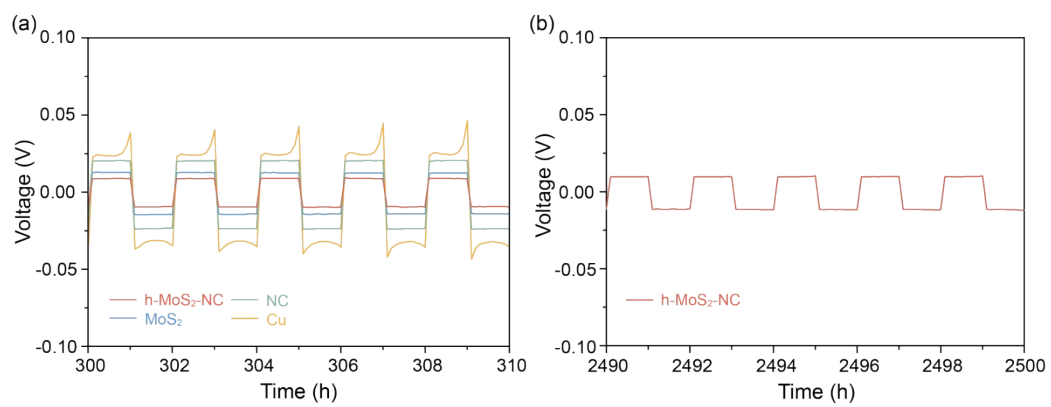

**Figure S7.** The detailed voltage curves at different time.



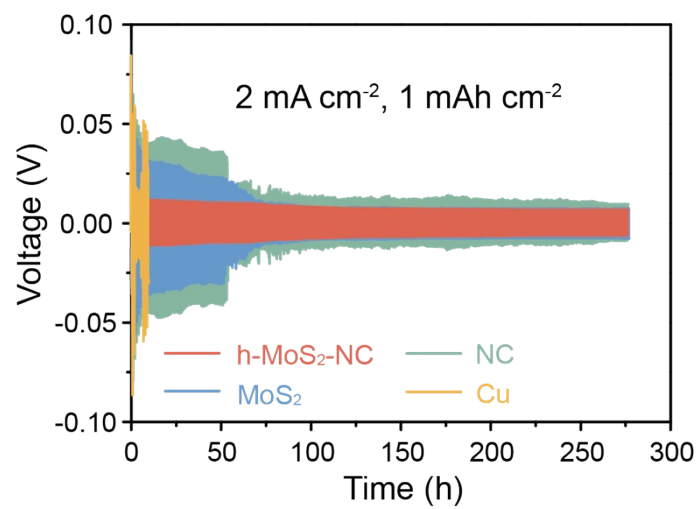

**Figure S8.** Voltage-time profiles of Li plating/stripping cycles at 2 mA cm<sup>-2</sup>.

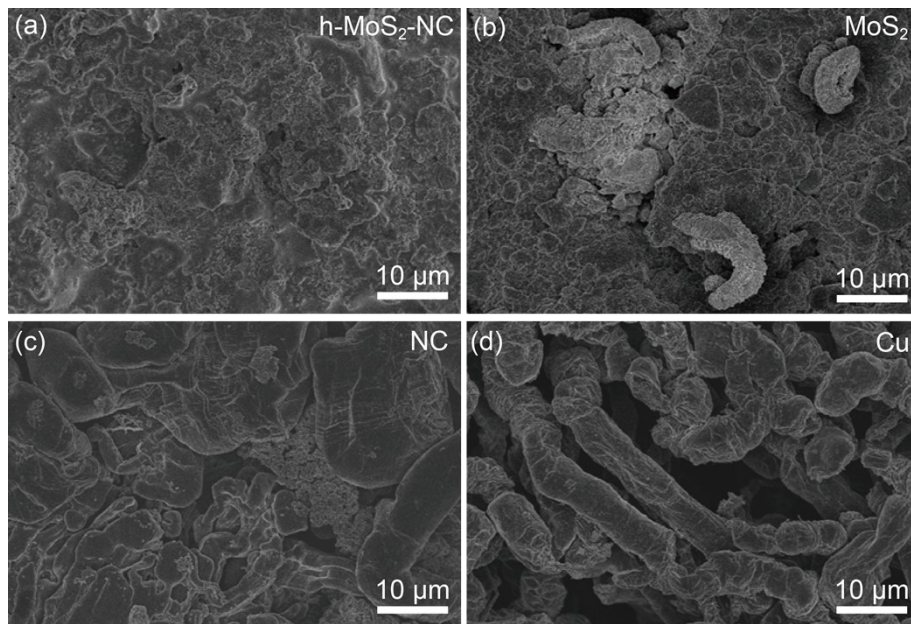

**Figure S9.** SEM images of a) h-MoS<sub>2</sub>-NC, b) MoS<sub>2</sub>, c) NC, and d) Cu foil after 50 cycles.

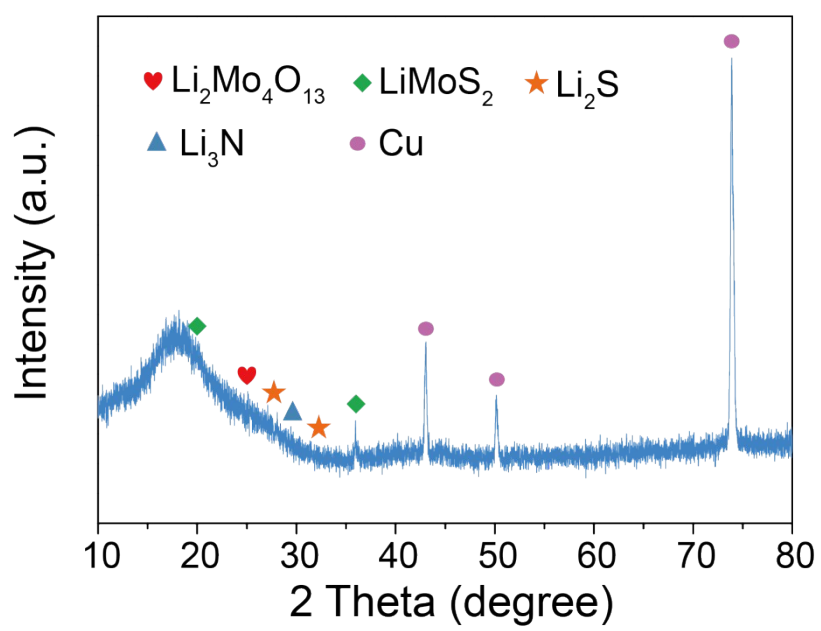

**Figure S10.** XRD spectrum of h-MoS<sub>2</sub>-NC after cycling.

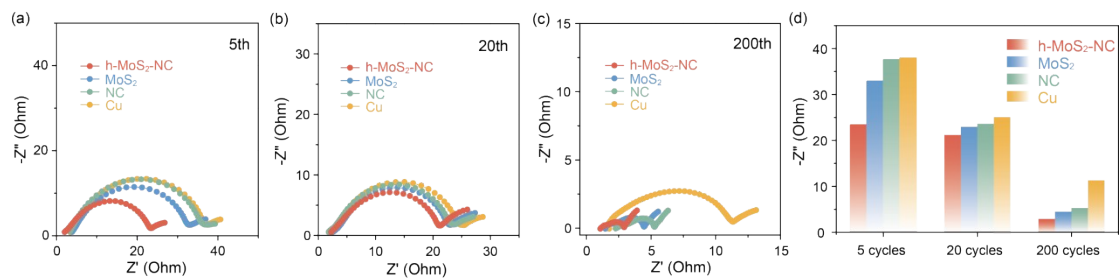

**Figure S11.** EIS spectra of h-MoS<sub>2</sub>-NC, MoS<sub>2</sub>, NC, and Cu at a) 5<sup>th</sup>, b) 20<sup>th</sup> and c) 100<sup>th</sup> cycles at 1 mA cm<sup>-2</sup> for 1 mAh cm<sup>-2</sup>. d) EIS of symmetric cell after different cycles.

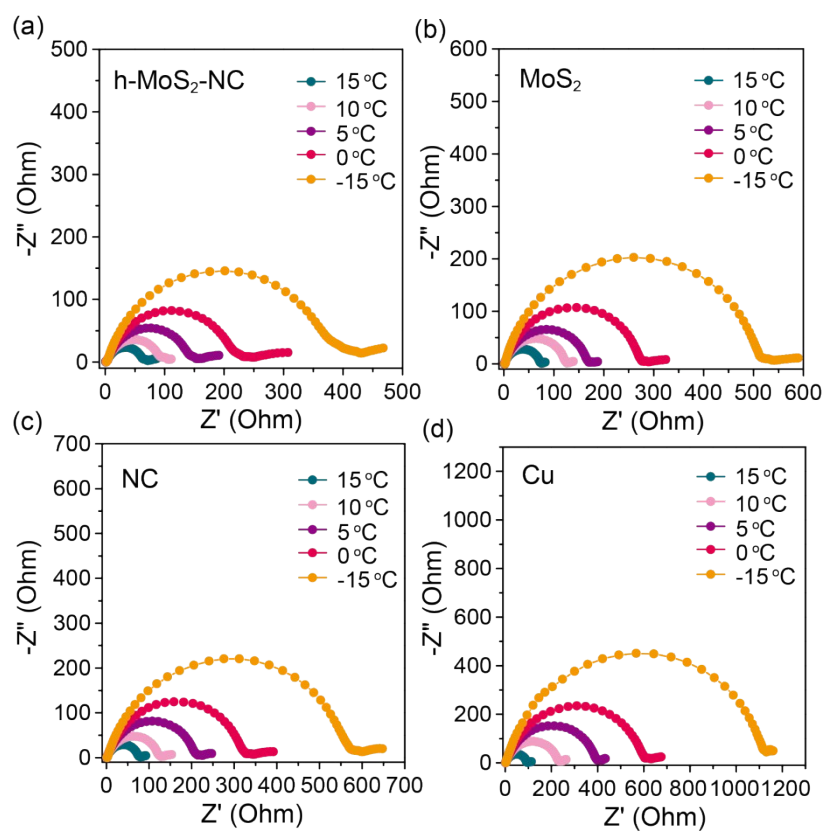

**Figure S12.** Nyquist plots at different temperatures for a) h-MoS<sub>2</sub>-NC, b) MoS<sub>2</sub>, c) NC, and d) Cu.

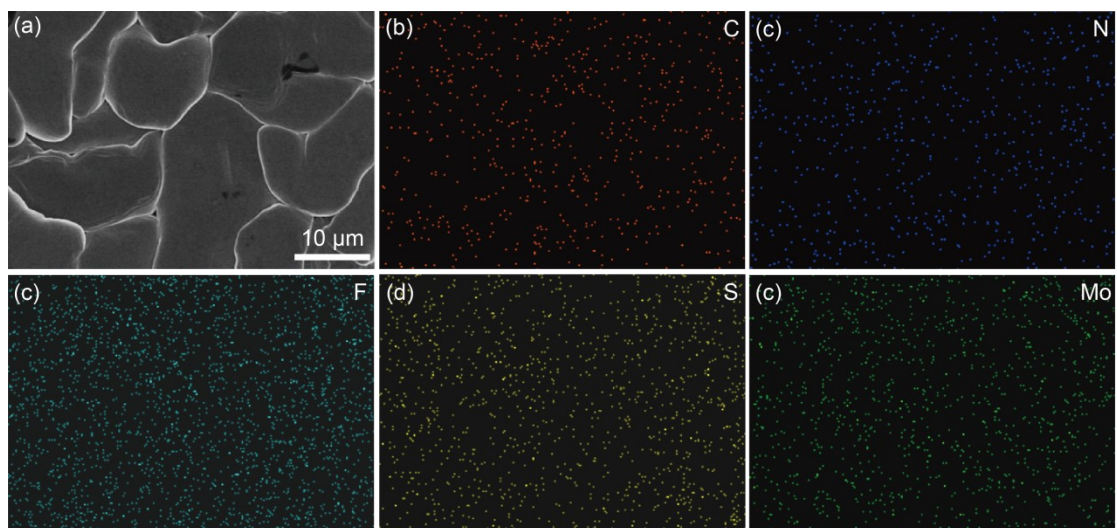

**Figure S13.** EDS Mapping of h-MoS<sub>2</sub>-NC after plating 10 mAh cm<sup>-2</sup> Li.

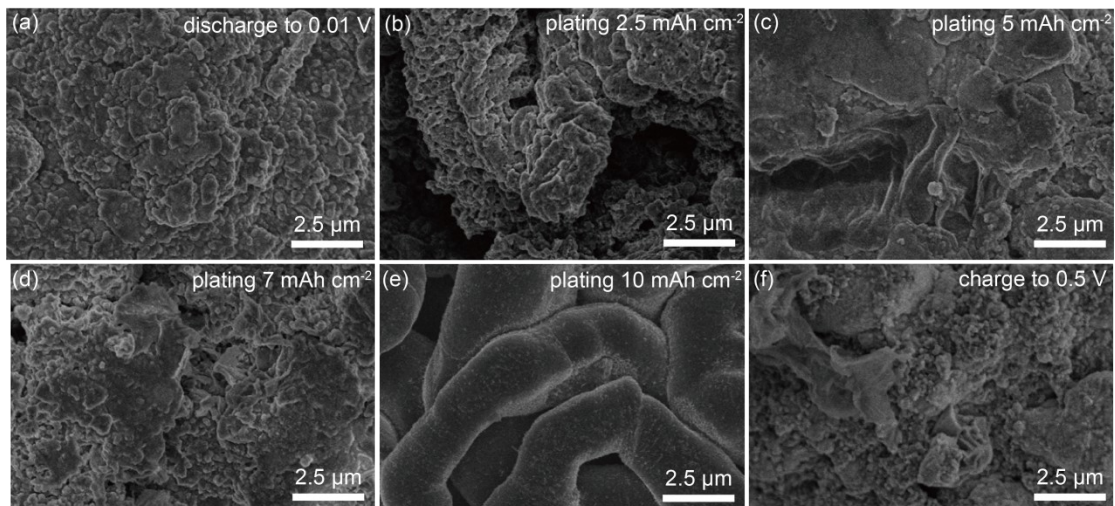

**Figure S14.** SEM images of MoS<sub>2</sub> after a) discharging to 0.01 V, b) plating 2.5 mAh cm<sup>-2</sup> Li, c) plating 5 mAh cm<sup>-2</sup> Li, d) plating 7 mAh cm<sup>-2</sup> Li, e) plating 10 mAh cm<sup>-2</sup> Li, and f) charging to 0.5 V.

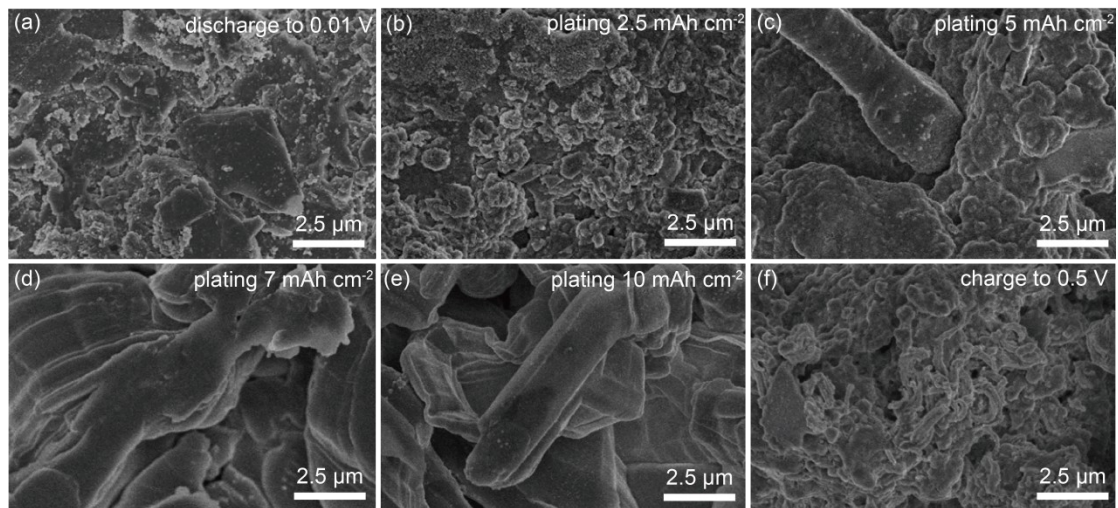

**Figure S15.** SEM images of NC after a) discharging to 0.01 V, b) plating 2.5 mAh cm<sup>-2</sup> Li, c) plating 5 mAh cm<sup>-2</sup> Li, d) plating 7 mAh cm<sup>-2</sup> Li, e) plating 10 mAh cm<sup>-2</sup> Li, and f) charging to 0.5 V.



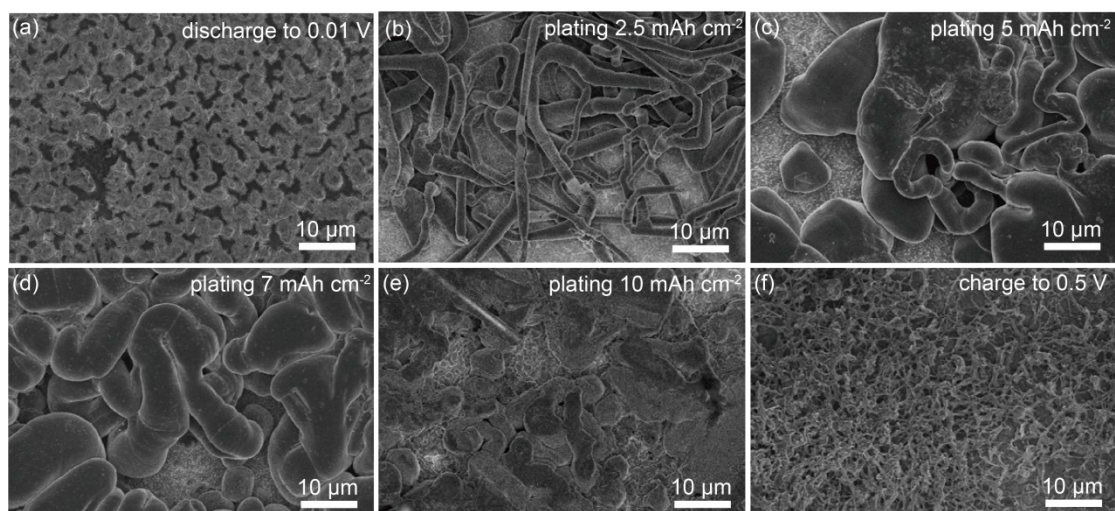

**Figure S16.** SEM images of Cu after a) discharging to 0.01 V, b) plating 2.5 mAh cm<sup>-2</sup> Li, c) plating 5 mAh cm<sup>-2</sup> Li, d) plating 7 mAh cm<sup>-2</sup> Li, e) plating 10 mAh cm<sup>-2</sup> Li, and f) charging to 0.5 V.

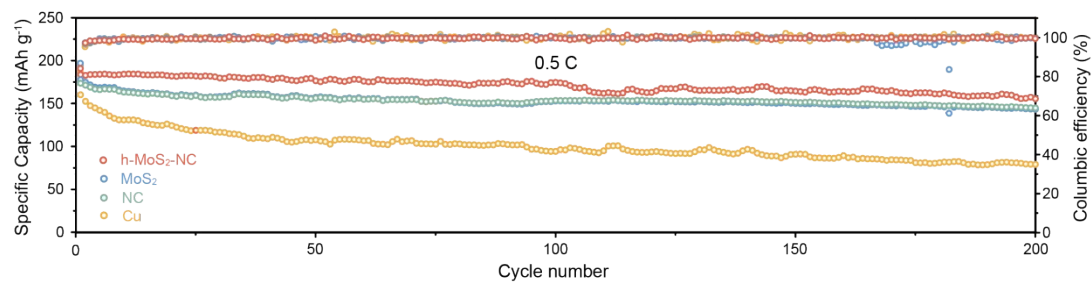

**Figure S17.** The cycling performances at 0.5 C of NCM111 full cells.

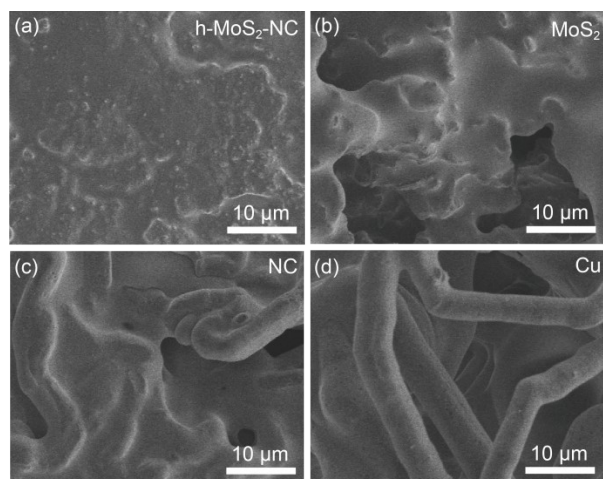

**Figure S18.** SEM images of a) Li@h-MoS<sub>2</sub>-NC and b) Li@MoS<sub>2</sub>, c) Li@NC, and d) Li@Cu anode

**Table S1.** Cyclic performance comparison of symmetric cells using different anodes

| Sample                                                                            | Cycle Time (h) | Current Density (mA cm <sup>-2</sup> ) | Capacity (mAh cm <sup>-2</sup> ) | Reference                                             |
|-----------------------------------------------------------------------------------|----------------|----------------------------------------|----------------------------------|-------------------------------------------------------|
| <b>h-MoS<sub>2</sub>-NC</b>                                                       | <b>2500</b>    | <b>1</b>                               | <b>1</b>                         | <b>This work</b>                                      |
| Li/graphene-C/Li <sub>3</sub> N                                                   | 1000           | 1                                      | 1                                | <i>Energy Storage Mater.</i> 2022, 46 563-569         |
| MoS <sub>2</sub> @NSPCB                                                           | 2000           | 1                                      | 1                                | <i>Adv. Sci.</i> 2022, 9, 2204232                     |
| Li-SiO <sub>x</sub> /C@C-Cu                                                       | 2000           | 1                                      | 1                                | <i>Adv. Energy Mater.</i> 2023, 13, 2204075           |
| Li//Ag@NC@LAZP-Li                                                                 | 1000           | 1                                      | 1                                | <i>ACS Sustainable Chem. Eng.</i> 2023, 11, 1785-1796 |
| Co <sub>3</sub> O <sub>4</sub> -CCNFs                                             | 1600           | 2                                      | 1                                | <i>Small</i> 2023, 19, 2207764                        |
| PCNF/MoS <sub>2</sub> -Li                                                         | 1000           | 0.5                                    | 1                                | <i>Chem. Eng. J.</i> 2022, 429 132479                 |
| GO-Zn/Cu                                                                          | 600            | 1                                      | 1                                | <i>Energy Storage Mater.</i> 2023, 56 572-581         |
| Li@Ti <sub>3</sub> C <sub>2</sub> T <sub>x</sub> /g-C <sub>3</sub> N <sub>4</sub> | 1000           | 0.5                                    | 0.5                              | <i>Adv. Sci.</i> 2022, 9, 2103930                     |
| Ag-Li <sub>2</sub> Se@CFC/Li                                                      | 2000           | 1                                      | 1                                | <i>Chem. Eng. J.</i> 2023, 462, 142034                |
| Graphite-SiO <sub>2</sub> Li                                                      | 1700           | 0.5                                    | 1                                | <i>Adv. Energy Mater.</i> 2019, 9, 1901486            |
| MIECS@Li                                                                          | 1000           | 1                                      | 1                                | <i>ACS Appl. Energy Mater.</i> 2021, 4, 6106-6115     |
